# Supplementary material
Source: PubMed Central journal article supplement (PMC4843651)
Supplement: rspb20160067supp1.pdf [file rspb20160067supp1.pdf]

## Electronic Supplementary Material

Table S1: Sex determination, mtDNA haplotype, opsin genotype (single letter code) and inferred functional opsin alleles for each sample

| Sample          | Sex | mtDNA | Exon 3                           |                        | Exon 5                           |     |            |            |     | Inferred alleles <sup>c</sup> |         |
|-----------------|-----|-------|----------------------------------|------------------------|----------------------------------|-----|------------|------------|-----|-------------------------------|---------|
|                 |     |       | Sequence replicates <sup>a</sup> | <b>180<sup>b</sup></b> | Sequence replicates <sup>a</sup> | 276 | <b>277</b> | <b>285</b> | 294 |                               | 309     |
| 06              | M   | D     | 2, 1                             | A                      | 2,1                              | T   | F          | A          | N   | F                             | 535     |
| <sup>d</sup> 11 | M   | G     | 2, 1                             | A                      | 2,1                              | T   | F          | A          | N   | F                             | 535     |
| <sup>d</sup> 23 | M   | G     | 2,1                              | A                      | 2,2                              | T   | F          | A          | N   | F                             | 535     |
| <sup>e</sup> 02 | M   | F     | 2,2                              | A                      | 1,1                              | A   | F          | T          | N   | Y                             | 550     |
| 12              | M   | D     | 2,2                              | A                      | 3,3                              | A   | F          | T          | N   | Y                             | 550     |
| 24              | M   | A     | 2,2                              | A                      | 4,4                              | A   | F          | T          | N   | Y                             | 550     |
| 58              | M   | E     | 2,2                              | A                      | 3,3                              | A   | F          | T          | N   | Y                             | 550     |
| <sup>d</sup> 13 | M   | A     | 3,3                              | A                      | 2,2                              | A   | Y          | T          | N   | Y                             | 556     |
| <sup>d</sup> 55 | M   | A     | 2,2                              | A                      | 2,2                              | A   | Y          | T          | N   | Y                             | 556     |
| 56              | M   | G     | 2,1                              | A                      | 1,1                              | A   | Y          | T          | N   | Y                             | 556     |
| 03              | M   | A     | 2,1                              | S                      | 2,2                              | A   | Y          | T          | N   | Y                             | 562     |
| 08              | M   | G     | 1,1                              | S                      | 2,2                              | A   | Y          | T          | N   | Y                             | 562     |
| 10              | M   | C     | 2,1                              | S                      | 1,1                              | A   | Y          | T          | N   | Y                             | 562     |
| 16              | F   | A     | 1,1                              | A                      | 3,3                              | A   | F          | A          | N   | F                             | 535     |
| 17              | F   | D     | 2,1                              | A                      | 2,2                              | T   | F          | A          | N   | F                             | 535     |
| 44              | F   | D     | 2,2                              | A                      | 3,3                              | A   | F          | A          | N   | F                             | 535     |
| 54              | F   | A     | 3,3                              | A                      | 2,2                              | T/A | Y          | A          | N   | Y                             | 543     |
| 05              | F   | A     | 2,1                              | A                      | 1,1                              | T   | F          | T          | N   | Y                             | 550     |
| 09              | F   | D     | 2,1                              | A                      | 2,2                              | T   | F          | T          | N   | Y                             | 550     |
| 21              | F   | C     | 1,1                              | A                      | 2,2                              | A   | F          | T          | N   | Y                             | 550     |
| 31              | F   | D     | 2,1                              | A                      | 2,1                              | A   | F          | T          | N   | Y                             | 550     |
| 40              | F   | D     | 3,3                              | A                      | 3,3                              | A   | F          | T          | N   | Y                             | 550     |
| 18              | F   | A     | 2,1                              | A                      | 2,2                              | A   | Y          | T          | N   | Y                             | 556     |
| 15              | F   | G     | 1,1                              | S                      | 2,2                              | A   | Y          | T          | N   | Y                             | 562     |
| <sup>d</sup> 42 | F   | A     | 2,1                              | S                      | 3,3                              | A   | Y          | T          | N   | Y                             | 562     |
| <sup>d</sup> 43 | F   | A     | 2,2                              | S                      | 1,1                              | A   | Y          | T          | N   | Y                             | 562     |
| 45              | F   | B     | 2,2                              | S                      | 2,2                              | A   | Y          | T          | N   | Y                             | 562     |
| <sup>e</sup> 01 | F   | F     | 2,2                              | A                      | 5,4                              | A   | F          | T/A        | N   | Y                             | 535/550 |
| 20              | F   | C     | 2,2                              | A                      | 3,3                              | T/A | F          | T/A        | N   | Y                             | 535/550 |
| 51              | F   | D     | 2,2                              | A                      | 5,4                              | A   | F          | T/A        | N   | Y                             | 535/550 |
| 57              | F   | A     | 2,2                              | A                      | 2,2                              | A   | F/Y        | T          | N   | Y                             | 550/556 |
| 04              | F   | C     | 2,2                              | A/S                    | 5,3                              | A   | F          | T          | N   | Y                             | 550/555 |
| 53              | F   | D     | 3,2                              | A/S                    | 1,1                              | A   | F          | T          | N   | Y                             | 550/555 |
| 59              | F   | D     | 2,2                              | A/S                    | 2,1                              | A   | Y          | T          | N   | Y                             | 556/562 |

<sup>a</sup>The number of times each X-linked opsin exon was amplified and sequenced on sense and antisense strands respectively. <sup>b</sup>Amino acid sites important for spectral tuning in primates in exon 3 and 5 are in bold. <sup>c</sup>Alleles correspond to spectral sensitivity peak of M/L opsins in New World monkeys. <sup>d</sup>Pairs of sample in bold (11/23, 13/55, 42/43) have identical genotypes across all loci and are assumed to be from the same individual. <sup>e</sup>Samples 01 and 02 were from the Yanayacu-Pucate River population.
